# Supplementary material
Source: PubMed Central journal article supplement (PMC137834)

TAR

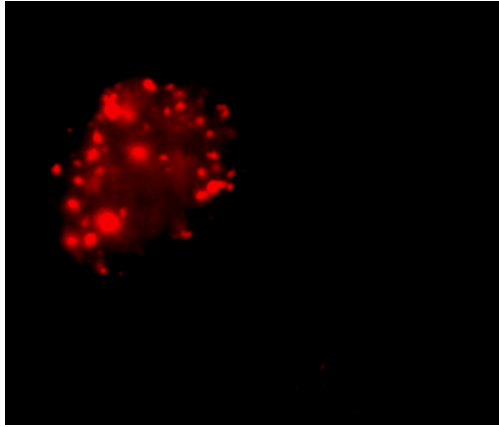

U3

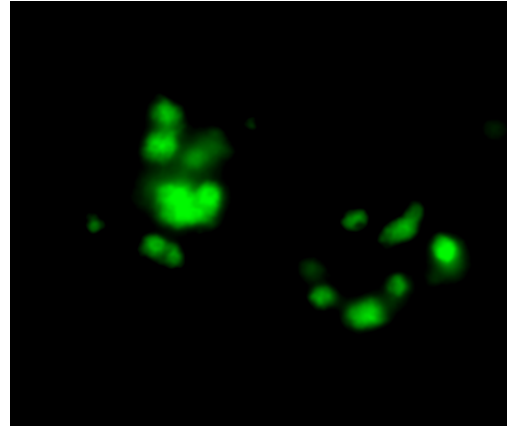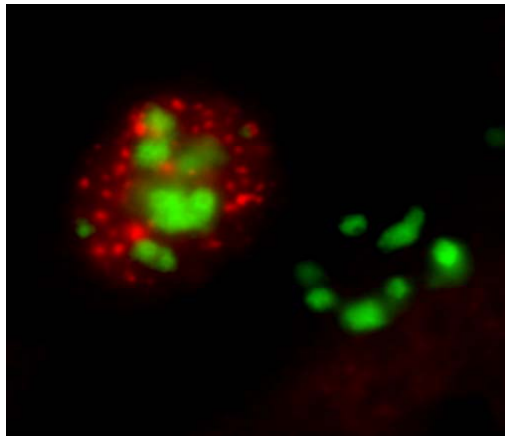

TAR/U3

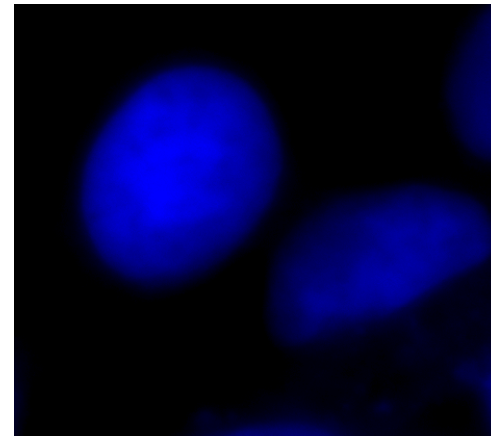

DAPI

Supplement: pnas_212229599_4.pdf [file pnas_212229599_4.pdf]

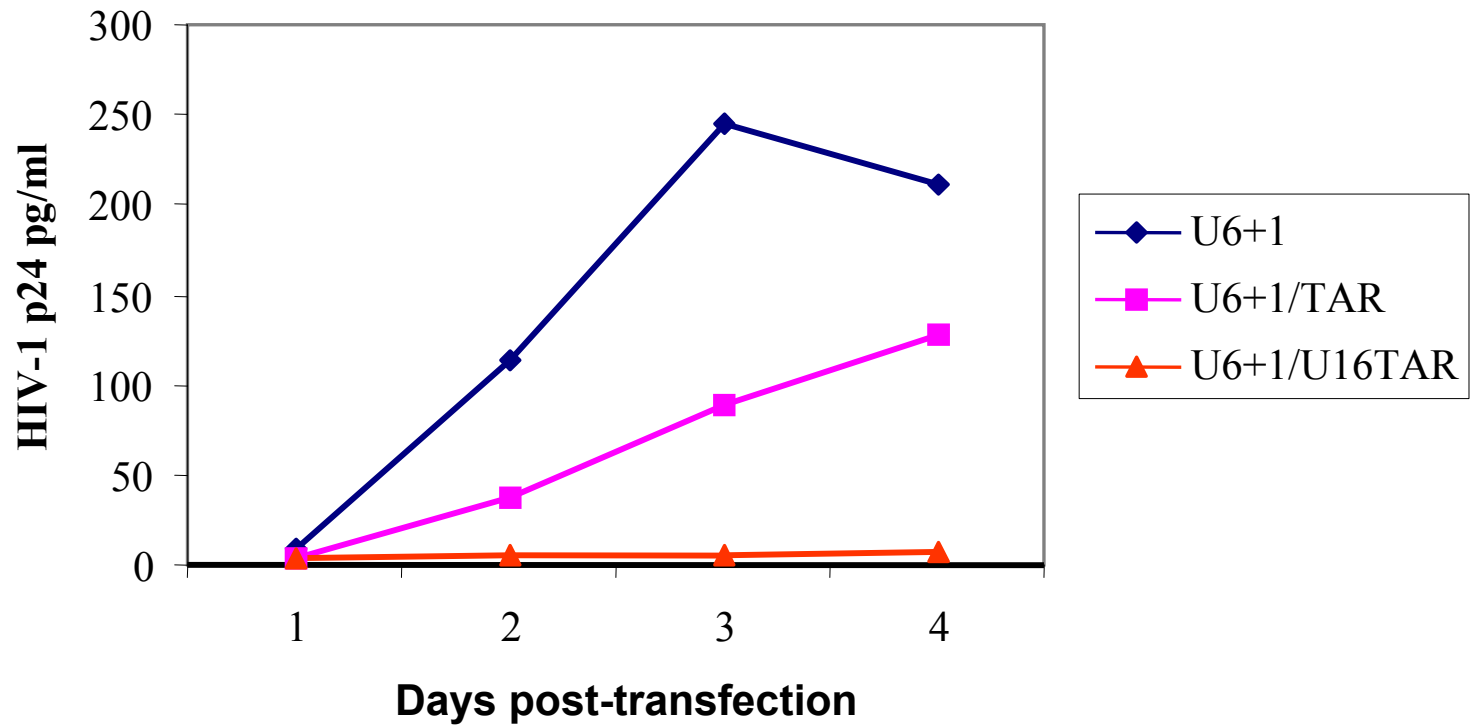

Supplement: pnas_212229599_5.pdf [file pnas_212229599_5.pdf]
